# Supplementary material
Source: PubMed Central journal article supplement (PMC4547248)
Supplement: pnas.201421380SI.pdf [file pnas.201421380SI.pdf]

# Supporting Information

Dorrell and Howe 10.1073/pnas.1421380112

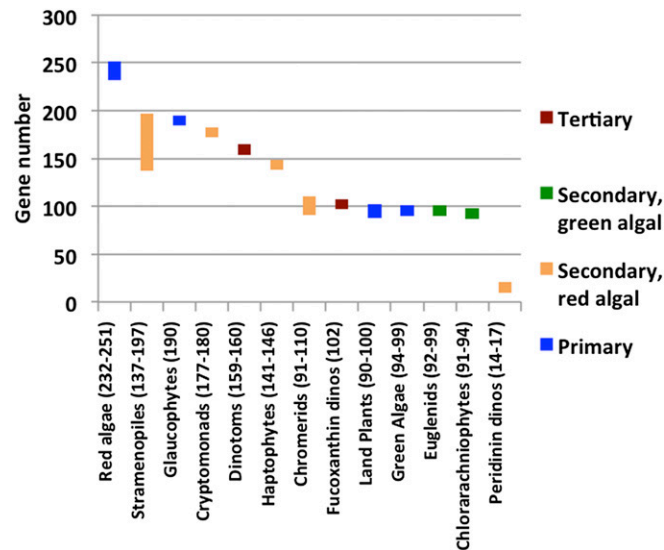

**Fig. S1.** Genome content of different plastid lineages. This figure shows the gene content of different major plastid lineages, using information compiled from refs. 1–7. This figure shows the gene content of different major plastid lineages. The color of each bar corresponds to the phylogenetic origin of the plastid lineage. The colored bars correspond to the range between the minimum and maximum numbers of genes identified in the plastid genomes of different functionally photosynthetic members of each lineage. Minimum and maximum gene numbers are additionally given in brackets next to each taxon name. Only one plastid genome has been completed from the glaucophytes and the fucoxanthin dinoflagellates; thus, the minimum and maximum gene numbers given in each case are identical.

1. Green BR (2011) Chloroplast genomes of photosynthetic eukaryotes. *Plant J* 66(1):34–44.
2. Hovde BT, et al. (2014) The mitochondrial and chloroplast genomes of the haptophyte *Chrysochromulina tobin* contain unique repeat structures and gene profiles. *BMC Genom* 15:604.
3. Imanian B, Pombert JF, Keeling PJ (2010) The complete plastid genomes of the two 'dinotoms' *Durinskia baltica* and *Kryptoperidinium foliaceum*. *PLoS ONE* 5(5):e10711.
4. Gabrielsen TM, et al. (2011) Genome evolution of a tertiary dinoflagellate plastid. *PLoS ONE* 6(4):e19132.
5. Wiegert KE, Bennett MS, Triemer RE (2013) Tracing patterns of chloroplast evolution in euglenoids: Contributions from *Colacium vesiculosum* and *Strombomonas acuminata* (Euglenophyta). *J Eukaryot Microbiol* 60(2):214–221.
6. Tanifuji G, et al. (2014) Nucleomorph and plastid genome sequences of the chlorarachniophyte *Lotharella oceanica*: Convergent reductive evolution and frequent recombination in nucleomorph-bearing algae. *BMC Genom* 15:374.
7. Mungpakdee S, et al. (2014) Massive gene transfer and extensive RNA editing of a symbiotic dinoflagellate plastid genome. *Genome Biol Evol* 6(6):1408–1422.

**Table S1. Editing events in peridinin and fucoxanthin dinoflagellate plastids**

| Species                        | Refs.  | Editing events                           |
|--------------------------------|--------|------------------------------------------|
| <b>Peridinin species</b>       |        |                                          |
| <i>Ceratium horridum</i>       | (1)    | A ↔ G; A ↔ U; C ↔ U; A → C; G → C; U → G |
| <i>Alexandrium tamarense</i>   | (2)    | A ↔ G; C ↔ U; A → C; G → C; U → G        |
| <i>Lingulodinium polyedrum</i> | (3)    | A ↔ G; C ↔ U; G → C; U → G               |
| <i>Heterocapsa triquetra</i>   | (4)    | A ↔ G; A ↔ U; C ↔ U; A → C; G → C        |
| <i>Symbiodinium minutum</i>    | (5)    | A → C; A ↔ G; A → U; C ↔ U; G → C; G → U |
| <b>Fucoxanthin species</b>     |        |                                          |
| <i>Karenia mikimotoi</i>       | (6)    | A ↔ C; A ↔ G; A ↔ U; C ↔ G; C ↔ U; G ↔ U |
| <i>Karlodinium veneficum</i>   | (7, 8) | A ↔ C; A ↔ G; A ↔ U; C ↔ G; C ↔ U; G ↔ U |

- Zauner S, Greilinger D, Laatsch T, Kowallik KV, Maier UG (2004) Substitutional editing of transcripts from genes of cyanobacterial origin in the dinoflagellate *Ceratium horridum*. *FEBS Lett* 577(3):535–538.
- Iida S, Kobiyama A, Ogata T, Murakami A (2009) Identification of transcribed and persistent variants of the *psbA* gene carried by plastid minicircles in a dinoflagellate. *Curr Genet* 55(5): 583–591.
- Wang Y, Morse D (2006) Rampant polyuridylylation of plastid gene transcripts in the dinoflagellate *Lingulodinium*. *Nucleic Acids Res* 34(2):613–619.
- Dang Y, Green BR (2009) Substitutional editing of *Heterocapsa triquetra* chloroplast transcripts and a folding model for its divergent chloroplast 16S rRNA. *Gene* 442(1-2):73–80.
- Mungpakdee S, et al. (2014) Massive gene transfer and extensive RNA editing of a symbiotic dinoflagellate plastid genome. *Genome Biol Evol* 6(6):1408–1422.
- Dorrell RG, Howe CJ (2012) Functional remodeling of RNA processing in replacement chloroplasts by pathways retained from their predecessors. *Proc Natl Acad Sci USA* 109(46): 18879–18884.
- Jackson CJ, Gornik SG, Waller RF (2013) A tertiary plastid gains RNA editing in its new host. *Mol Biol Evol* 30(4):788–792.
- Richardson E, Dorrell RG, Howe CJ (2014) Genome-wide transcript profiling reveals the coevolution of plastid gene sequences and transcript processing pathways in the fucoxanthin dinoflagellate *Karlodinium veneficum*. *Mol Biol Evol* 31(9):2376–2386.

**Table S2. Predicted plastid proteins of peridinin origin in serial dinoflagellates**

| Sequence                                            | Organism            | Refs.  | Notes                                |
|-----------------------------------------------------|---------------------|--------|--------------------------------------|
| 3-Dehydroquinate synthetase                         | Fucoxanthin         | (1)    | Ultimately of proteobacterial origin |
| Ascorbate peroxidase                                | Fucoxanthin         | (2)    |                                      |
| ATP synthase gamma subunit                          | Fucoxanthin         | (2)    | Ultimately of actinobacterial origin |
| Cysteine synthase                                   | Fucoxanthin         | (2)    |                                      |
| Form II NADP-dependent isocitrate dehydrogenase     | Fucoxanthin         | (3)    | Ultimately of proteobacterial origin |
| Glyceraldehyde-3-phosphate dehydrogenase isoform C1 | Fucoxanthin         | (4, 5) |                                      |
| O-methyltransferase                                 | Fucoxanthin         | (1)    | Ultimately of proteobacterial origin |
| Phosphoribulokinase                                 | Fucoxanthin         | (2)    |                                      |
| Unidentified poly(U) addition/editing factors       | Fucoxanthin         | (6)    | Ultimately of proteobacterial origin |
| 1-Deoxy-D-xylulose 5-phosphate reductoisomerase     | <i>Lepidodinium</i> | (7)    |                                      |
| 4-Diphosphocytidyl-2C-methyl-D-erythritol kinase    | <i>Lepidodinium</i> | (7)    | Ultimately of proteobacterial origin |
| Ferredoxin NADP reductase                           | <i>Lepidodinium</i> | (7)    |                                      |
| Glyceraldehyde-3-phosphate dehydrogenase isoform C1 | <i>Lepidodinium</i> | (5)    |                                      |

This table lists all of the ESTs identified in dinoflagellates that have undergone serial endosymbiosis events that are predicted to be derived from the ancestral peridinin plastid symbiosis, and encode plastid-targeted proteins. Data in this table are compiled from refs. 1–7.

- Waller RF, Slamovits CH, Keeling PJ (2006) Lateral gene transfer of a multigene region from cyanobacteria to dinoflagellates resulting in a novel plastid-targeted fusion protein. *Mol Biol Evol* 23(7):1437–1443.
- Patron NJ, Waller RF, Keeling PJ (2006) A tertiary plastid uses genes from two endosymbionts. *J Mol Biol* 357(5):1373–1382.
- Nosenko T, Bhattacharya D (2007) Horizontal gene transfer in chromalveolates. *BMC Evol Biol* 7:173.
- Nosenko T, et al. (2006) Chimeric plastid proteome in the Florida “red tide” dinoflagellate *Karenia brevis*. *Mol Biol Evol* 23(11):2026–2038.
- Takishita K, et al. (2008) Origins of plastids and glyceraldehyde-3-phosphate dehydrogenase genes in the green-colored dinoflagellate *Lepidodinium chlorophorum*. *Gene* 410(1):26–36.
- Dorrell RG, Howe CJ (2012) Functional remodeling of RNA processing in replacement chloroplasts by pathways retained from their predecessors. *Proc Natl Acad Sci USA* 109(46): 18879–18884.
- Minge MA, et al. (2010) A phylogenetic mosaic plastid proteome and unusual plastid-targeting signals in the green-colored dinoflagellate *Lepidodinium chlorophorum*. *BMC Evol Biol* 10:191.
